# Supplementary material
Source: PubMed Central journal article supplement (PMC3458468)
Supplement: ASN.2012030285_ASN2012030285SupplementaryData.pdf [file ASN.2012030285_ASN2012030285SupplementaryData.pdf]

### **Supplementary data:**

**Figure S1:** Immunostaining data confirmed that diabetes enhances tuberin phosphorylation in kidney cortex of compared to control rats and insulin treatment prevented these changes. Note that tuberin phosphorylation staining is more prominent in the majority of the tubular cells.

**Figure S2:** (A) Activation of mTOR (phospho-p70S6K at Thr<sup>389</sup>) was confirmed by immunofluorescence staining and (B) increased fibronectin as well as (C) collagen IV protein expression by peroxidase staining in kidney cortex of diabetic rats. Treatment of diabetic rats with insulin (d+i) reversed these changes to control (c) levels. Note that p-p70S6K phosphorylation, fibronectin and collagen IV staining are more prominent in the majority of the tubular cells.

# P-tuberin

TSC2<sup>+/+</sup>

TSC2<sup>+/-</sup>

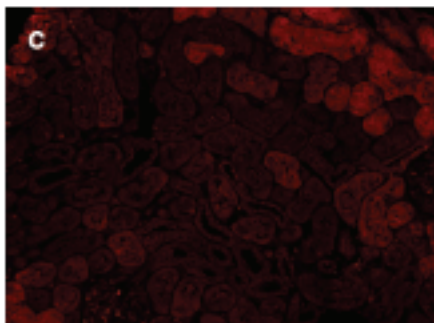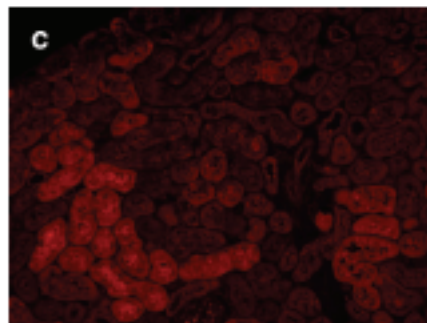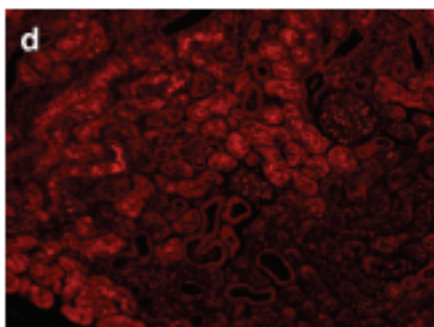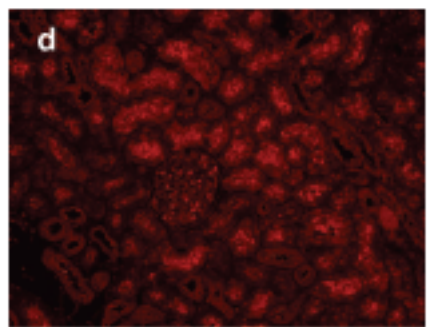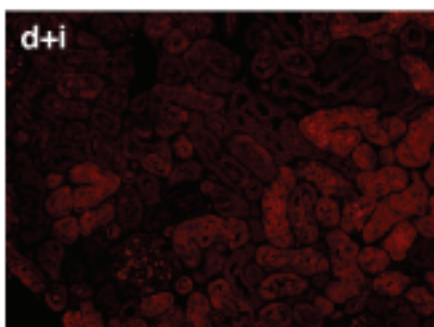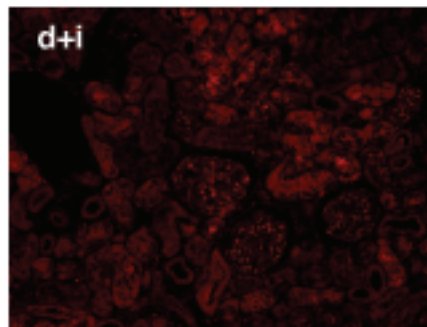

Figure S1

**A****TSC2<sup>+/+</sup>****TSC2<sup>+/-</sup>**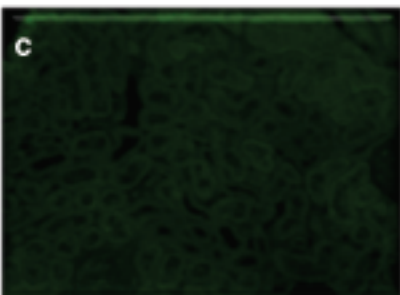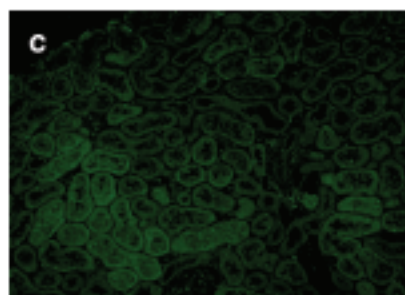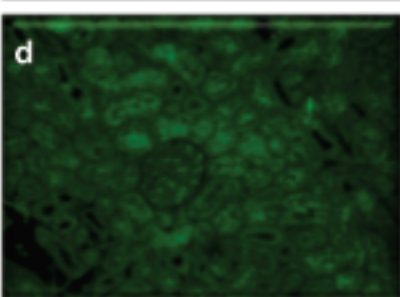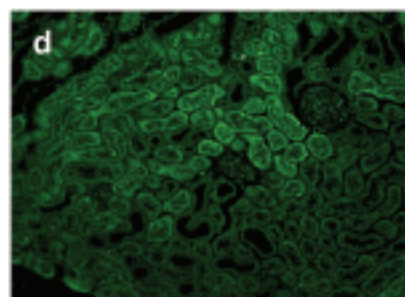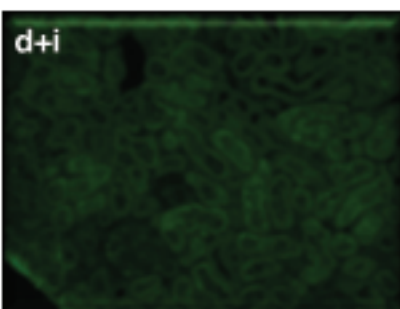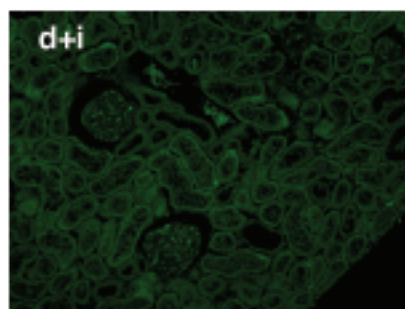**B****TSC2<sup>+/+</sup>****TSC2<sup>+/-</sup>**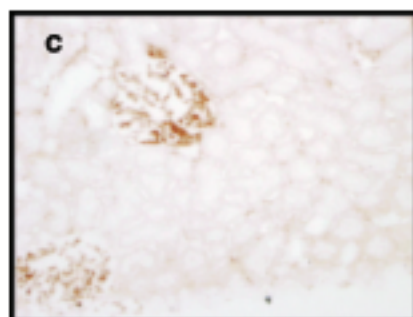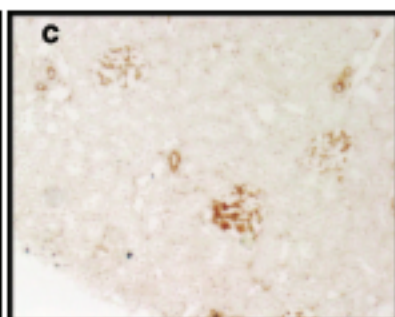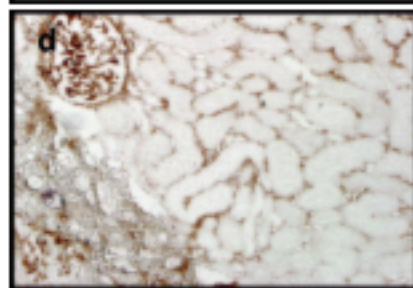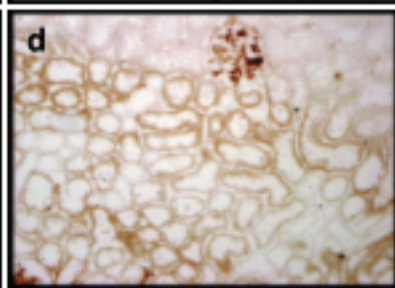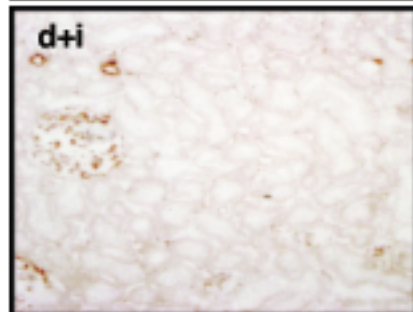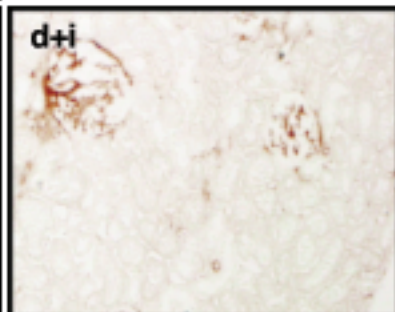**Figure S2**

**C****TSC2<sup>+/+</sup>****TSC2<sup>+/-</sup>**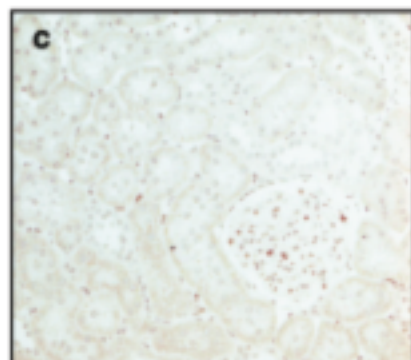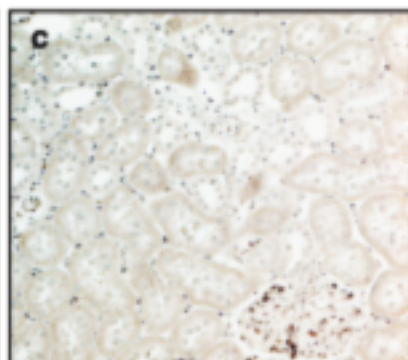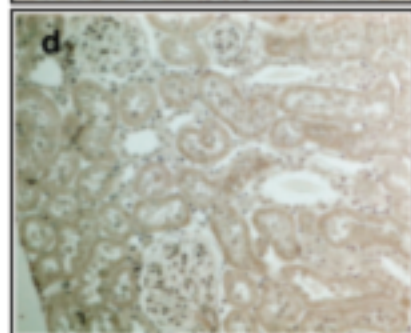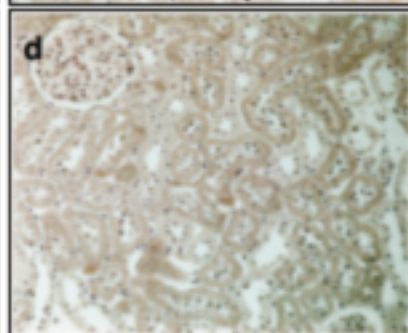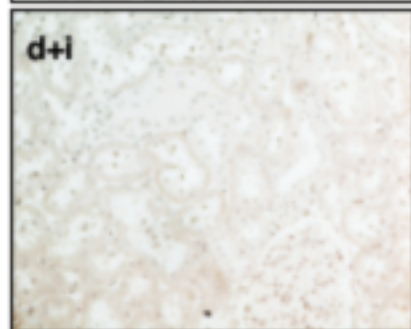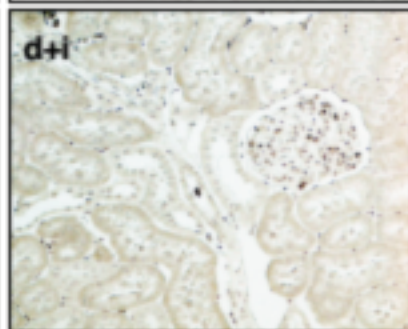**Figure S2**
